# Supplementary material for: Engineering a light-controlled F1 ATPase using structure-based protein design
Source: PeerJ. 2016 Jul 28;4:e2286. doi: 10.7717/peerj.2286 (PMC4974930; doi:10.7717/peerj.2286)
Supplement: Supplemental Information 5 [file peerj-04-2286-s005.csv]

A	D	B	C	mean	sd	se
no ABDM	15.76182	14.58617	15.74758	15.36519	0.67469	0.38953
dark	2.86513	2.51198	1.47811	2.28507	0.72081	0.41616
UV	3.8945	4.12644	3.77108	3.93067	0.18042	0.10417
